# Supplementary material for: TiH2-supported Ru catalyst with unusual electron transfer behaviour for highly efficient carbon dioxide methanation at low temperature
Source: Royal Society of Chemistry journal article supplement (doi:10.1039/d3ta01600e), 2023-01-01
Supplement: d3ta01600e1.pdf [file d3ta01600e1.pdf]

Supporting Information for

**TiH<sub>2</sub>-supported Ru catalyst with unusual electron transfer behaviour for highly efficient carbon dioxide methanation at low temperature**

Zhujie He,<sup>†a</sup> Huanfeng Huang,<sup>†a</sup> Zhuodi Chen,<sup>a</sup> Yuqian Liang,<sup>a</sup> Zhixiang Huang,<sup>a</sup> Shunnian Ning,<sup>a</sup> Lilin Tan,<sup>b</sup> Mihail Barboiu,<sup>a,c</sup> Dawei Wang <sup>\*a</sup> and Cheng-Yong Su <sup>a</sup>

<sup>a</sup> Lehn Institute of Functional Materials, MOE Laboratory of Bioinorganic and Synthetic Chemistry, School of Chemistry, Sun Yat-Sen University, Guangzhou 510275, China

<sup>b</sup> Chemistry and Chemical Engineering Guangdong Laboratory, Shantou 515031, China

<sup>c</sup> Institut Europeen des Membranes, Adaptive Supramolecular Nanosystems Group, University of Montpellier, ENSCM-CNRS, Place E. Bataillon CC047, 34095 Montpellier, France

<sup>†</sup> These authors contributed equally to this work

Corresponding Author

E-mail: wdawei@mail.sysu.edu.cn

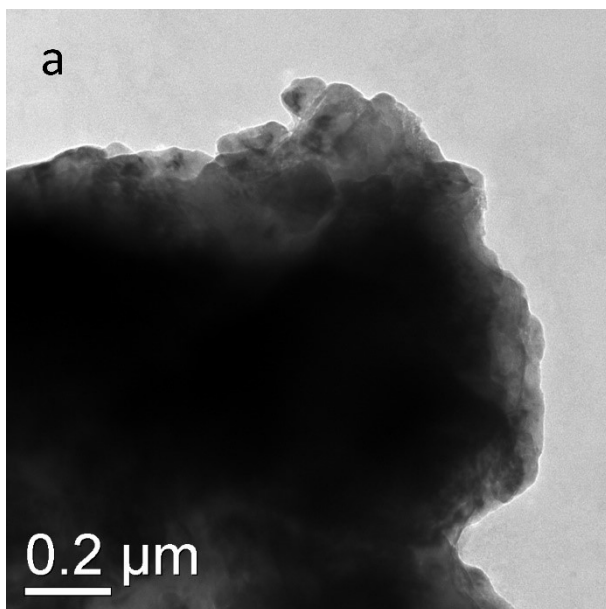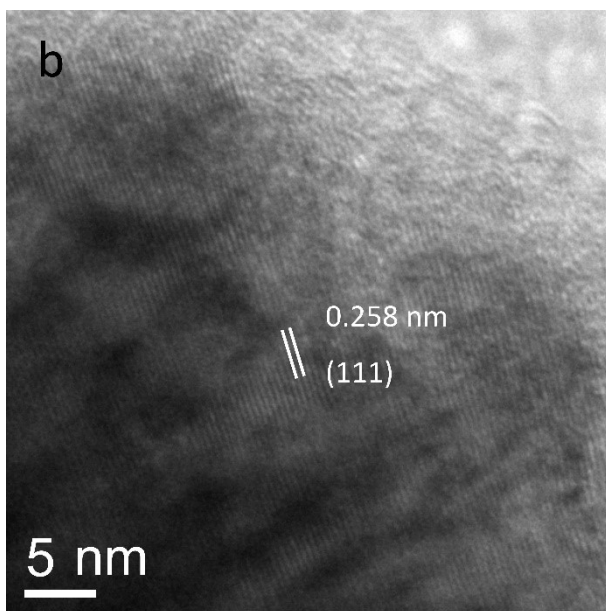

**Fig. S1** TEM images of TiH<sub>2</sub> at different magnification.

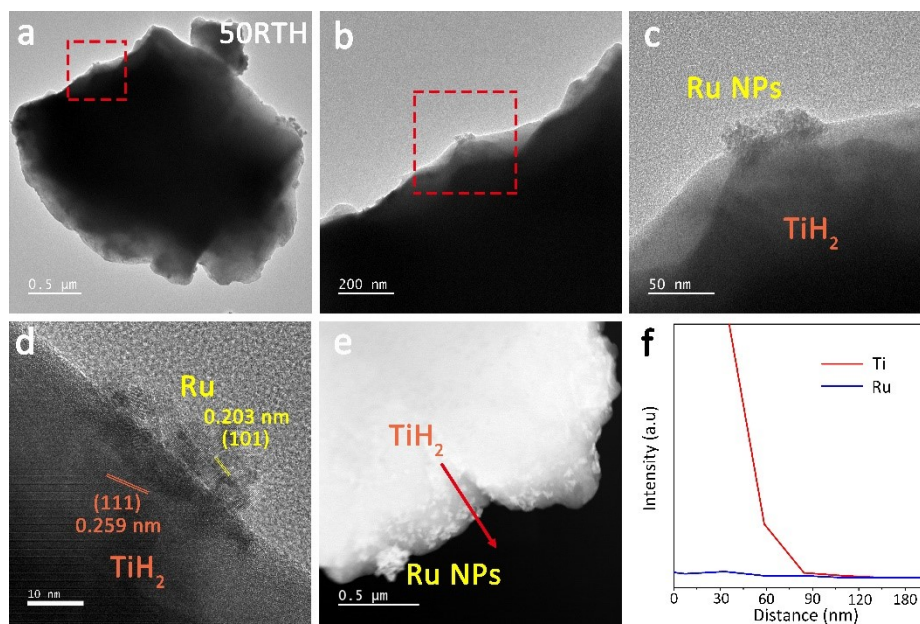

**Fig. S2** Interfacial structure of 50RTH. (a–c) TEM images, (d) HRTEM image, (e) STEM image, and (d) EDS line scans.

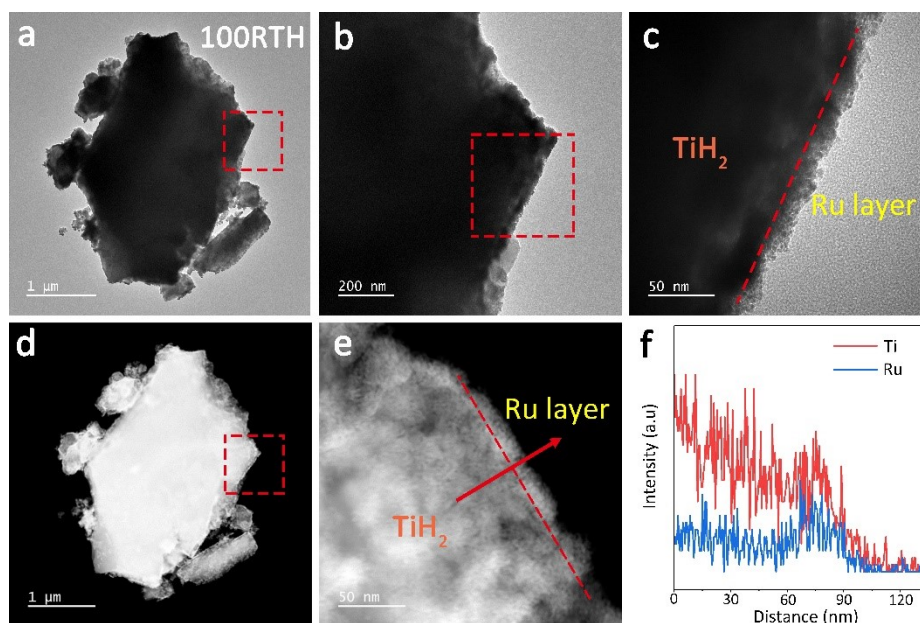

**Fig. S3** Interfacial structure of 100RTH. (a–c) TEM images, (d) HRTEM image, (e) STEM image, and (d) EDS line scans.

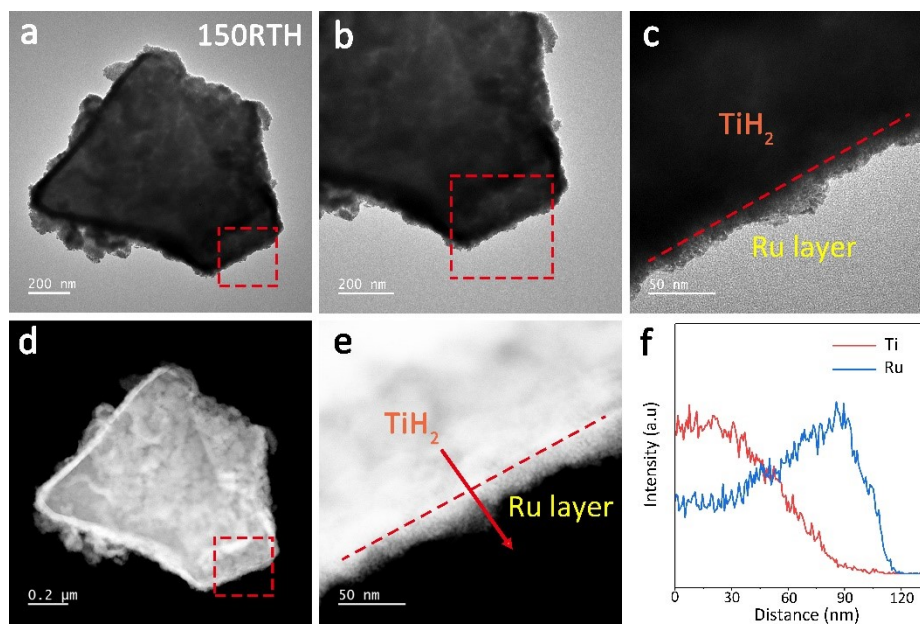

**Fig. S4** Interfacial structure of 150RTH. (a–c) TEM images, (d) HRTEM image, (e) STEM image, and (d) EDS line scans.

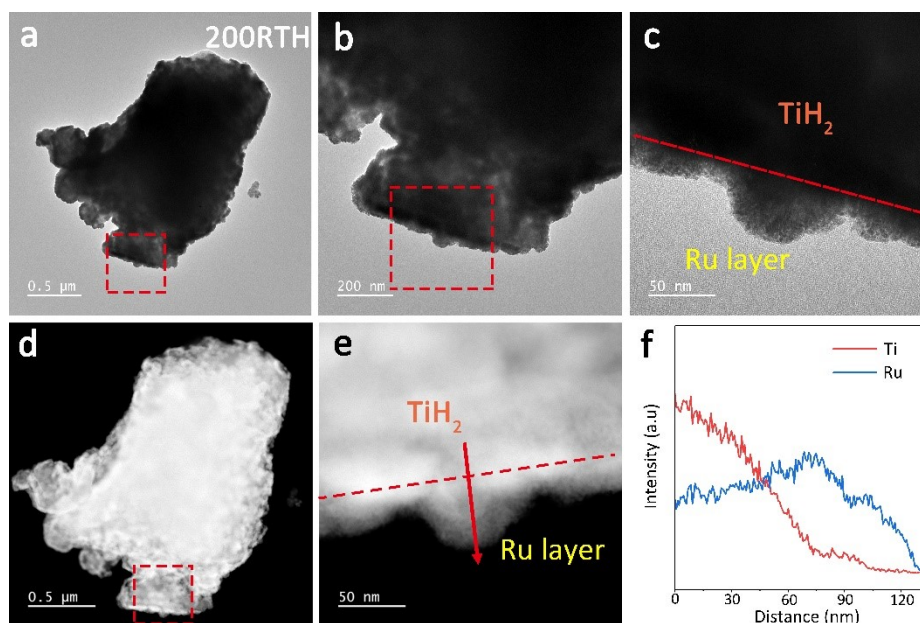

**Fig. S5** Interfacial structure of 200RTH. (a–c) TEM images, (d) HRTEM image, (e) STEM image, and (d) EDS line scans.

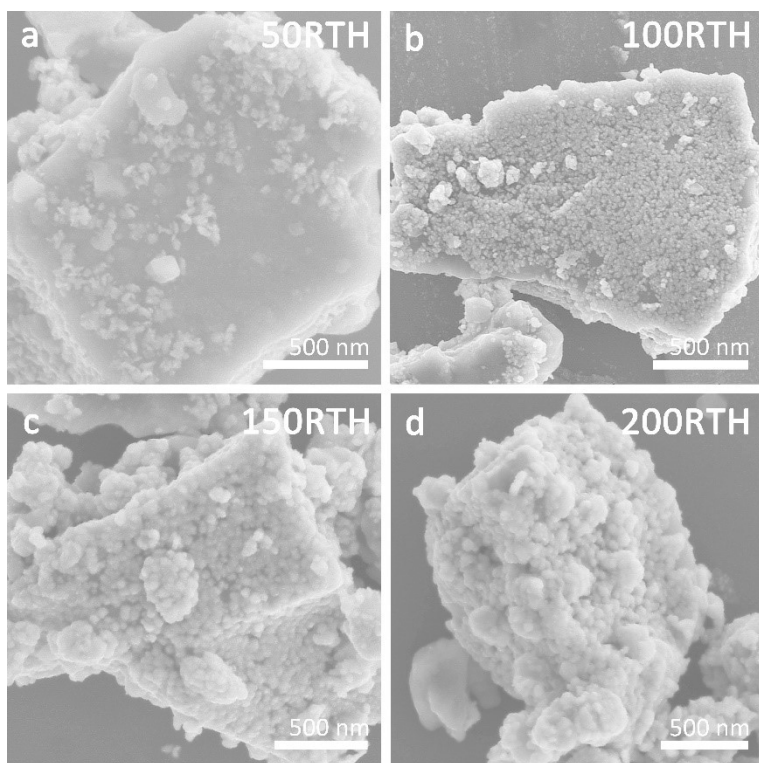

**Fig. S6** SEM images of (a) 50RTH, (b) 100RTH, (c) 150RTH, and (d) 200RTH.

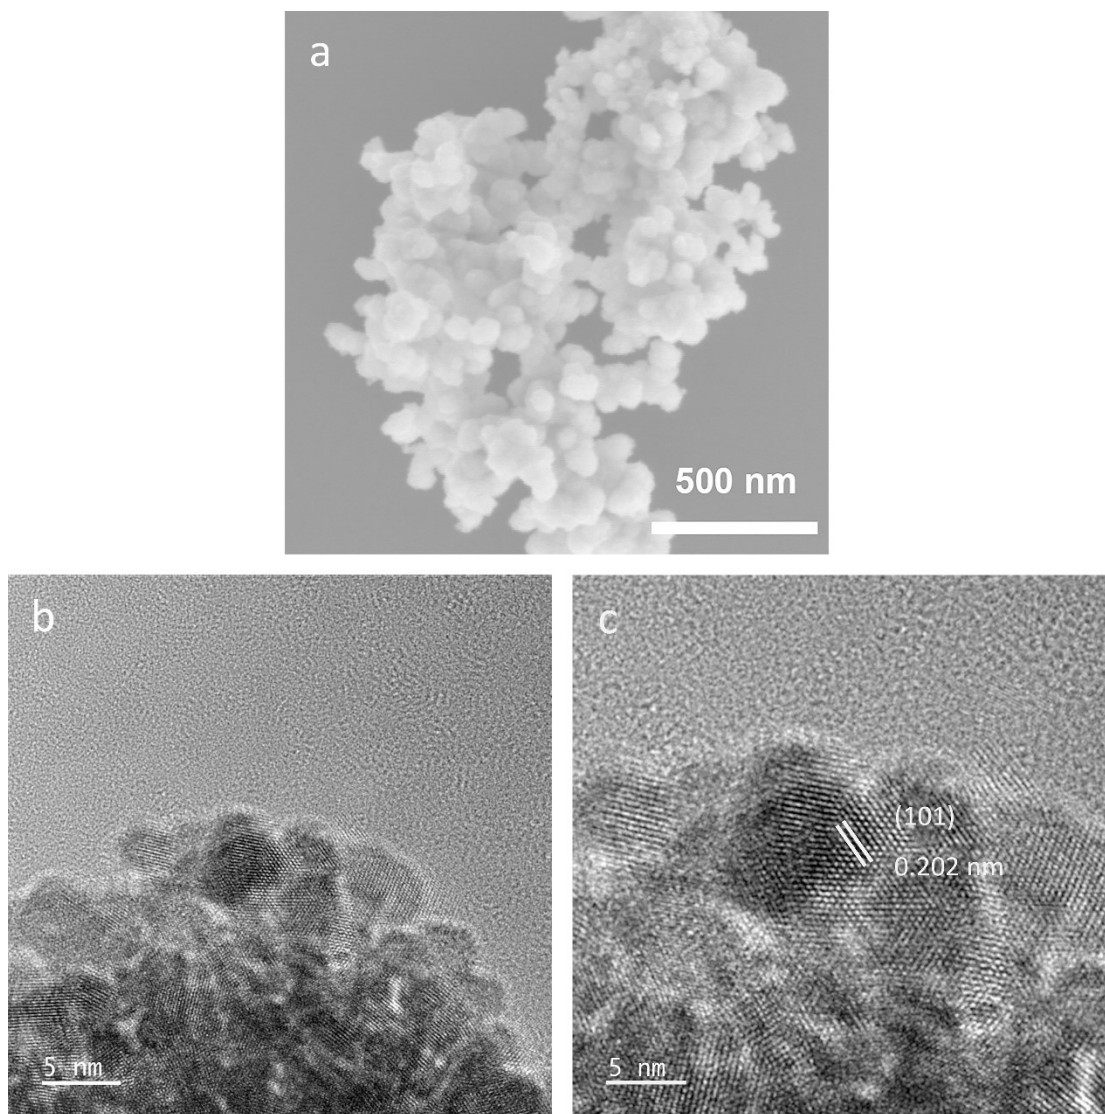

**Fig. S7** (a) SEM, (b) TEM, and (c) HRTEM images of Ru NPs.

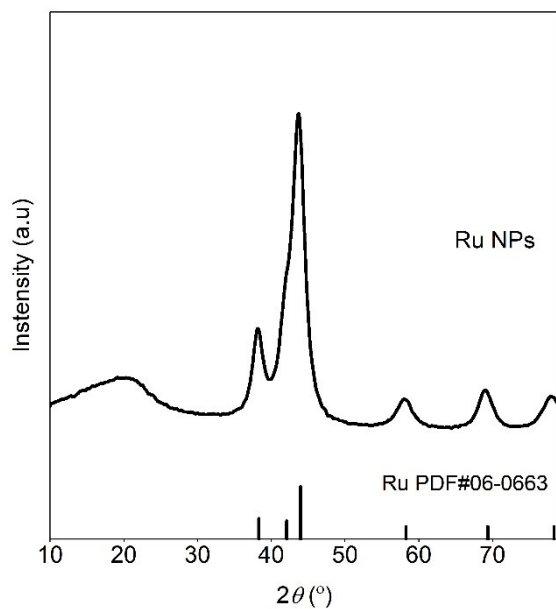

**Fig. S8** XRD patterns of Ru NPs.

Diffraction peaks at  $2\theta = 38.4, 42.2, 44.0, 58.3, 69.4$  and  $78.4^\circ$  are indexed to the (100), (002), (101), (102), (110), and (103) lattice planes of hexagonal ruthenium, respectively.

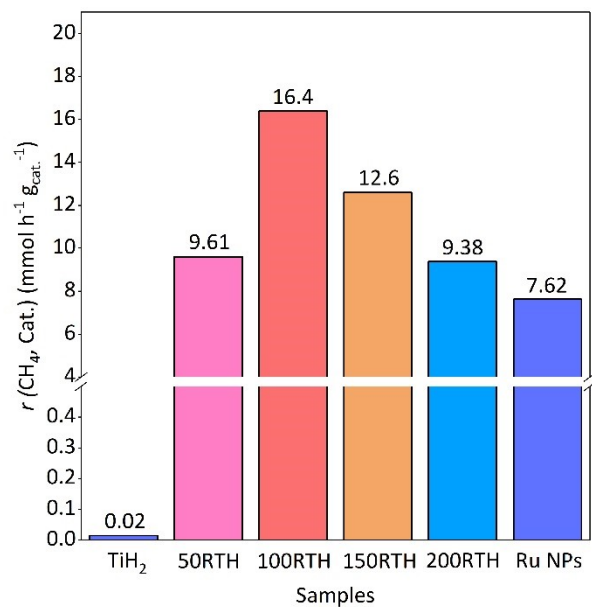

**Fig. S9** Production rate of CH<sub>4</sub> based on the total mass of catalysts.



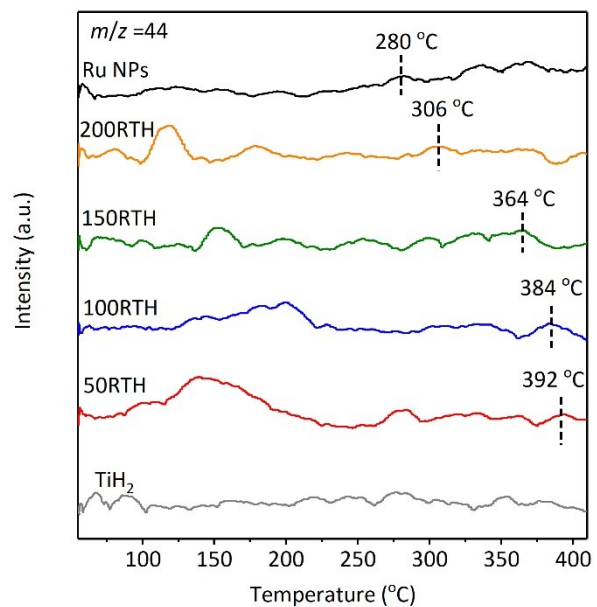

**Fig. S10** Mass spectrometer signals for CO<sub>2</sub> ( $m/z = 44$ ) during temperature-programmed desorption measurement for  $m$ RTH and control catalysts.

**Table S1.** Element analysis of *m*RTH based on ICP measurements.

| Samples | Ti (wt. %) | Ru (wt. %) |
|---------|------------|------------|
| 50RTH   | 85.17      | 5.72       |
| 100RTH  | 82.38      | 9.76       |
| 150RTH  | 74.96      | 15.54      |
| 200RTH  | 72.89      | 17.35      |

**Table S2.** Contact potentials from KPFM measurements shown in Figure 3.

| Samples          | Absolute contact potential (mV) |                             |                         |
|------------------|---------------------------------|-----------------------------|-------------------------|
|                  | $E_{\text{sample}}$ (mV)        | $E_{\text{substrate}}$ (mV) | $\Delta\text{CPD}$ (mV) |
| TiH <sub>2</sub> | -415                            | -407                        | -8.0                    |
| 50RTH            | -110                            | -112                        | 2.0                     |
| 100RTH           | -93.6                           | -120                        | 26.4                    |
| 150RTH           | -46.6                           | -84.0                       | 37.4                    |
| 200RTH           | -92.2                           | -161                        | 68.8                    |

**Table S3.** Binding energies of XPS peaks shown in Figure 4a-b.

| Samples          | Binding energy (eV)                |                                      |                                    |                                   |
|------------------|------------------------------------|--------------------------------------|------------------------------------|-----------------------------------|
|                  | Ti <sup>4+</sup> 2p <sub>3/2</sub> | TiO <sub>2-x</sub> 2p <sub>3/2</sub> | Ru <sup>4+</sup> 3d <sub>5/2</sub> | Ru <sup>0</sup> 3d <sub>3/2</sub> |
| TiH <sub>2</sub> | 458.22                             | 457.92                               | /                                  | /                                 |
| 50RTH            | 458.34                             | 457.93                               | 280.30                             | 279.52                            |
| 100RTH           | 458.82                             | 458.35                               | 280.33                             | 279.73                            |
| 150RTH           | 458.83                             | 458.42                               | 280.45                             | 279.77                            |
| 200RTH           | 459.38                             | 458.63                               | 280.50                             | 279.83                            |
| Ru NPs           | /                                  | /                                    | 280.63                             | 279.90                            |

**Table S4.** Performance comparison between *m*RTH and others Ru-based catalysts reported in literature.

| Catalysts                        | Temperature<br>°C | Pressure                                                                                                                                       | CO <sub>2</sub> conversion<br>% | CO <sub>2</sub> Selectivity<br>% | CH <sub>4</sub> Production<br>Rate                                        | References                                     |
|----------------------------------|-------------------|------------------------------------------------------------------------------------------------------------------------------------------------|---------------------------------|----------------------------------|---------------------------------------------------------------------------|------------------------------------------------|
| <b>100RTH</b>                    | <b>200</b>        | <b>4 bars</b><br><b>CO<sub>2</sub>:H<sub>2</sub> = 1:4</b>                                                                                     | <b>86.4</b>                     | <b>99.8</b>                      | <b>168.7</b><br><b>(mmol g<sub>Ru</sub><sup>-1</sup> h<sup>-1</sup>)</b>  | <b>This work</b>                               |
| 5%Ru/TiO <sub>2</sub> -P25-450   | 200               | 1 atm<br>CO <sub>2</sub> :H <sub>2</sub> = 1:4<br>20 mL/min                                                                                    | 27.4                            | 100                              | 9.25<br>(mmol g <sub>Ru</sub> <sup>-1</sup> h <sup>-1</sup> )             | <i>Catal. Sci. Technol.</i> ,<br>2016, 6, 8117 |
| Ru/TiO <sub>2</sub>              | 400               | 1 atm<br>10%CO <sub>2</sub> /40%<br>H <sub>2</sub> /50%Ar<br>40 mL/min                                                                         | 75                              | ~97                              | 78.48<br>(mmol g <sub>cat.</sub> <sup>-1</sup> h <sup>-1</sup> )          | <i>Appl. Surf. Sci.</i> ,<br>2022, 587, 152856 |
| Ru/TiO <sub>2</sub> -200Air-300R | 200               | 0.1 MPa<br>H <sub>2</sub> /CO <sub>2</sub> /N <sub>2</sub> =<br>70/20/10<br>GHSV = 60 000<br>mL h <sup>-1</sup> g <sub>cat</sub> <sup>-1</sup> | 4.05                            | 100                              | 3.47<br>mmol <sub>CO2</sub> g <sub>Ru</sub> <sup>-1</sup> h <sup>-1</sup> | <i>ACS Catal.</i> 2022, 12,<br>1697            |

|                              |     |                                                                                                                      |      |     |                                                               |                                          |
|------------------------------|-----|----------------------------------------------------------------------------------------------------------------------|------|-----|---------------------------------------------------------------|------------------------------------------|
| Ru/CeO <sub>2</sub>          | 250 | CO <sub>2</sub> (15%,v/v)<br>H <sub>2</sub> (60%, v/v)<br>Ar (25%, v/v)<br>40 mL/min                                 | 92.7 |     | 4.032<br>mmol g <sub>cat.</sub> <sup>-1</sup> h <sup>-1</sup> | <i>J. Am. Chem. Soc.</i> 2016, 138, 6298 |
| Ru(3%)/CeO <sub>2</sub> -NCs | 150 | CO <sub>2</sub> (15%, v/v)<br>H <sub>2</sub> (60%, v/v)<br>Ar (25%, v/v)<br>40 mL/min                                | <10  | >99 | 0.17<br>mmol g <sub>cat.</sub> <sup>-1</sup> h <sup>-1</sup>  | <i>J. Catal.</i> , 2015, 329, 177        |
| 5%Ru/N-CNF                   | 370 | 5%CO <sub>2</sub><br>15%H <sub>2</sub> /Ar<br>60 mL min <sup>-1</sup>                                                | ~60  | ~61 | 1900<br>mmol g <sub>Ru</sub> <sup>-1</sup> h <sup>-1</sup>    | <i>ChemCatChem</i> , 2015,7,1347         |
| Ru/TiO <sub>2</sub>          | 200 | 1 atm<br>CO <sub>2</sub> /H <sub>2</sub> = 1:3<br>GHSV = 20000<br>mL g <sub>cat.</sub> <sup>-1</sup> h <sup>-1</sup> | ~1   |     | 3.51<br>mmol g <sub>Ru</sub> <sup>-1</sup> h <sup>-1</sup>    | <i>J. Mater. Chem. A</i> , 2020, 8, 7390 |
| Ru/ZrO <sub>2</sub> @C(MI L) | 300 | 40 bar<br>H <sub>2</sub> /CO <sub>2</sub> = 3:1<br>70 mL/min                                                         | 64   | 100 | 2340<br>mmol g <sub>cat.</sub> <sup>-1</sup> h <sup>-1</sup>  | <i>Catal. Today</i> , 2021, 371, 120     |

|                                |     |                                                                                      |       |      |       |                                                   |
|--------------------------------|-----|--------------------------------------------------------------------------------------|-------|------|-------|---------------------------------------------------|
| Ru/pBN-1.13%F                  | 400 | 10 bar<br>H <sub>2</sub> :CO <sub>2</sub> = 4:1<br>GHSV = 18000 h <sup>-1</sup>      | 61.6% | 96.5 | 7380  | <i>ACS Catal.</i> 2019, 9,<br>10077               |
| <b>Ru/TiO<sub>2</sub>(001)</b> | 200 | 1 atm<br>10% CO <sub>2</sub><br>40% H <sub>2</sub><br>50%N <sub>2</sub><br>20 mL/min | ~10%  | 100  | ~2.16 | <i>J. CO<sub>2</sub> Util.</i> , 2019,<br>33, 242 |
